RESEARCH ARTICLE

# Mutation in *BMPR2* Promoter: A ‘Second Hit’ for Manifestation of Pulmonary Arterial Hypertension?

Rebecca Rodríguez Viales<sup>1,2</sup>✉, Christina A. Eichstaedt<sup>1</sup>✉, Nicola Ehlken<sup>1</sup>, Christine Fischer<sup>2</sup>, Mona Lichtblau<sup>1</sup>, Ekkehard Grünig<sup>1</sup>, Katrin Hinderhofer<sup>2\*</sup>

**1** University Hospital Heidelberg, Centre for pulmonary hypertension of the Thoraxclinic Heidelberg, Heidelberg, Germany, **2** Heidelberg University, Institute of Human Genetics, Heidelberg, Germany

✉ These authors contributed equally to this work.

\* [Katrin.Hinderhofer@med.uni-heidelberg.de](mailto:Katrin.Hinderhofer@med.uni-heidelberg.de)

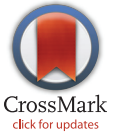

**OPEN ACCESS**

**Citation:** Viales RR, Eichstaedt CA, Ehlken N, Fischer C, Lichtblau M, Grünig E, et al. (2015) Mutation in *BMPR2* Promoter: A ‘Second Hit’ for Manifestation of Pulmonary Arterial Hypertension? PLoS ONE 10(7): e0133042. doi:10.1371/journal.pone.0133042

**Editor:** Marco Idzko, University Hospital Freiburg, GERMANY

**Received:** March 12, 2015

**Accepted:** June 22, 2015

**Published:** July 13, 2015

**Copyright:** © 2015 Viales et al. This is an open access article distributed under the terms of the [Creative Commons Attribution License](https://creativecommons.org/licenses/by/4.0/), which permits unrestricted use, distribution, and reproduction in any medium, provided the original author and source are credited.

**Data Availability Statement:** All relevant data are within the paper.

**Funding:** The authors received no specific funding for this work.

**Competing Interests:** The authors have declared that no competing interests exist.

## Abstract

### Background

Hereditary pulmonary arterial hypertension (HPAH) can be caused by autosomal dominant inherited mutations of TGF- $\beta$  genes, such as the *bone morphogenetic protein receptor 2* (*BMPR2*) and *Endoglin* (*ENG*) gene. Additional modifier genes may play a role in disease manifestation and severity. In this study we prospectively assessed two families with known *BMPR2* or *ENG* mutations clinically and genetically and screened for a second mutation in the *BMPR2* promoter region.

### Methods

We investigated the *BMPR2* promoter region by direct sequencing in two index-patients with invasively confirmed diagnosis of HPAH, carrying a mutation in the *BMPR2* and *ENG* gene, respectively. Sixteen family members have been assessed clinically by non-invasive methods and genetically by direct sequencing.

### Results

In both index patients with a primary *BMPR2* deletion (exon 2 and 3) and *Endoglin* missense variant (c.1633G>A, p.(G545S)), respectively, we detected a second mutation (c.-669G>A) in the promoter region of the *BMPR2* gene. The index patients with 2 mutations/variants were clinically severely affected at early age, whereas further family members with only one mutation had no manifest HPAH.

### Conclusion

The finding of this study supports the hypothesis that additional mutations may lead to an early and severe manifestation of HPAH. This study shows for the first time that in the regulatory region of the *BMPR2* gene the promoter may be important for disease penetrance.

Further studies are needed to assess the incidence and clinical relevance of mutations of the *BMPR2* promoter region in a larger patient cohort.

## Introduction

In different forms of pulmonary arterial hypertension (PAH) as in idiopathic (IPAH), heritable (HPAH), and PAH associated with other conditions (APAH) several mutations in genes of the transforming growth factor beta (TGF- $\beta$ ) superfamily of receptors such as *bone morphogenetic protein receptor 2* (*BMPR2*) gene, *Activin A receptor type II-like 1* (*ACVRL1*, also called *ALK1*) [1], *Endoglin* (*ENG*) [2], and *SMAD9* and *SMAD4* [3] have been found [4].

Mutation of the *BMPR2* gene is the most important causal factor of HPAH and IPAH. Approximately 80% of patients with HPAH and 25% of IPAH-patients [5, 6] carry a mutation in the *BMPR2* gene. Usually only exons are investigated for mutations. However, recently an intronic *BMPR2* mutation has been detected in HPAH-patients showing that probably the frequency of *BMPR2* mutations are even higher than previously detected [7]. Most recently, further rare mutations in genes linked to the BMP signaling pathway have been identified such as *KCNA3* or *KCNA5* mutations in IPAH [8–11], *CAV-1* [12], *BMP9/GDF2* in HPAH [13–15], *EIF2AK4* in patients with pulmonary veno-occlusive disease [16, 17].

These findings highlight the importance of BMP signalling for the manifestation of PAH. However, although mutations in the *BMPR2* gene occur in approximately 80–90% of HPAH patients, only about 20–80% of heterozygous gene carriers develop a manifest disease during life-time due to an incomplete age and gender related penetrance [18–20]. The underlying factors of the incomplete penetrance are yet unknown [20].

Most recently, Wang et al. identified two mutations in an IPAH patient, one missense mutation in exon 11 of the *BMPR2* gene and one frameshift mutation in the *KCNA5* gene [21]. The authors hypothesize that the *KCNA5* mutation to be a modifier, which may account for early onset, severity and rapid deterioration of PAH in the index patient. In this study, we worked on a similar hypothesis that additional mutations in the promoter region of the *BMPR2* gene may influence disease penetrance in patients with already known mutation in a TGF- $\beta$  gene. Depending on the impact of mutations of the *BMPR2* gene a minimum threshold of translated protein may not be reached, which determines whether the disease becomes manifest [22]. Therefore, the aim of this study was to analyze the *BMPR2* promoter region in HPAH families with already diagnosed mutations in TGF- $\beta$  genes. The promoter region of the *BMPR2* gene was analyzed using direct sequencing in the index patients and family members.

## Materials and Methods

### Study population and design

Two German families (Family 1 and 2) were clinically and genetically examined. Families of index patients with manifest hereditary pulmonary hypertension were studied. A three generation pedigree has been drawn for each family, including 19 and 9 family members, respectively.

All genetically related family members were invited to participate in a clinical and genetic evaluation. After informed consent was obtained, 13 and 7 members, respectively, underwent genetic assessment and counseling. EDTA-blood was taken for genetic analysis. All relatives were residents of a low altitude area and were assessed in Heidelberg, Germany, at an altitude of ~100 meters. Relatives and patients gave their written informed consent to participate in this

study. Parents gave written informed consent for any minors participating in this study. The study was approved by the ethical committee at Heidelberg University, Germany.

## Clinical procedures

Clinical procedures consisted of recording the family and medical history, physical examination, routine laboratory parameters including N-type pro brain natriuretic peptide (NT-proBNP), 12-lead ECG, lung function test, arterial blood gases, Doppler-echocardiography, and cardiopulmonary exercise testing. Manifest HPAH was diagnosed according to the current guidelines [23] using right heart catheterization.

## Doppler-echocardiography

Two-dimensional and color-flow guided continuous-wave-Doppler-echocardiographic recordings were obtained using 2.5 MHz Duplex transducers and conventional equipment (Vivid 7, GE Healthcare, Milwaukee, Wisconsin, USA) as described previously [24]. Echocardiographic studies were performed by an experienced cardiac sonographer (EG), who had no knowledge of the molecular genetic data. Doppler-echocardiography and cardiopulmonary exercise testing were performed using a cardiorespiratory diagnosis system (MasterScreen CPX, CareFusion GmbH, Hoechberg, Germany).

## Right heart catheterization

Right heart catheterization (RHC) was performed in two patients. Pressures at rest were recorded using a polygraph (Hellige, Freiburg, Germany) as described before [25]. RHC was done by triple-lumen 7F-Swan-Ganz thermodilution catheters (Edwards Lifesciences, Irvine, CA, USA). Cardiac output (CO) was measured at least in triplicate by thermodilution with a variation of less than 10% between the measured values. The zero reference point for pressure recordings was set at the level of the right atrium in the midaxillary line (phlebostatic axis). All examinations and measurements were performed by the same experienced team. There were no complications.

## Mutation analysis

Genomic DNA was prepared from peripheral blood lymphocytes. In the index patients, the complete coding sequence and exon/intron boundaries of the *BMPR2*, *ACVRL1* (*ALK1*) and *ENG* gene were amplified and analyzed by Sanger sequencing. In a second step, the promoter region of the *BMPR2* gene (up to position c.-1270) was investigated. Family members were tested for mutations that were identified in the index patients by sequencing of the respective genomic regions. Primer sequences and PCR conditions are available upon request. Standard DNA sequencing reactions were performed using version 1.1 of Big Dye terminator cycle sequencing kit (Applied Biosystems Inc., Darmstadt, Germany) and were analyzed on a 3130xl Genetic Analyzer (Applied Biosystems Inc., Darmstadt, Germany). Furthermore, screening for larger *BMPR2* rearrangements was performed with the SALSA Multiplex Ligation-dependent Probe Amplification (MLPA) P093-B2 HHT/PPH1 probe mix kit (MRC-Holland BV, Amsterdam, the Netherlands). Sequence variation nomenclature according to the Human Genome Variation Society (HGVS; [www.hgvs.org](http://www.hgvs.org)) was used and refers to the NCBI human *BMPR2* nucleotide sequence (accession number: NM\_001204.6) and *ENG* nucleotide sequence (accession number: NM\_001114753.2).

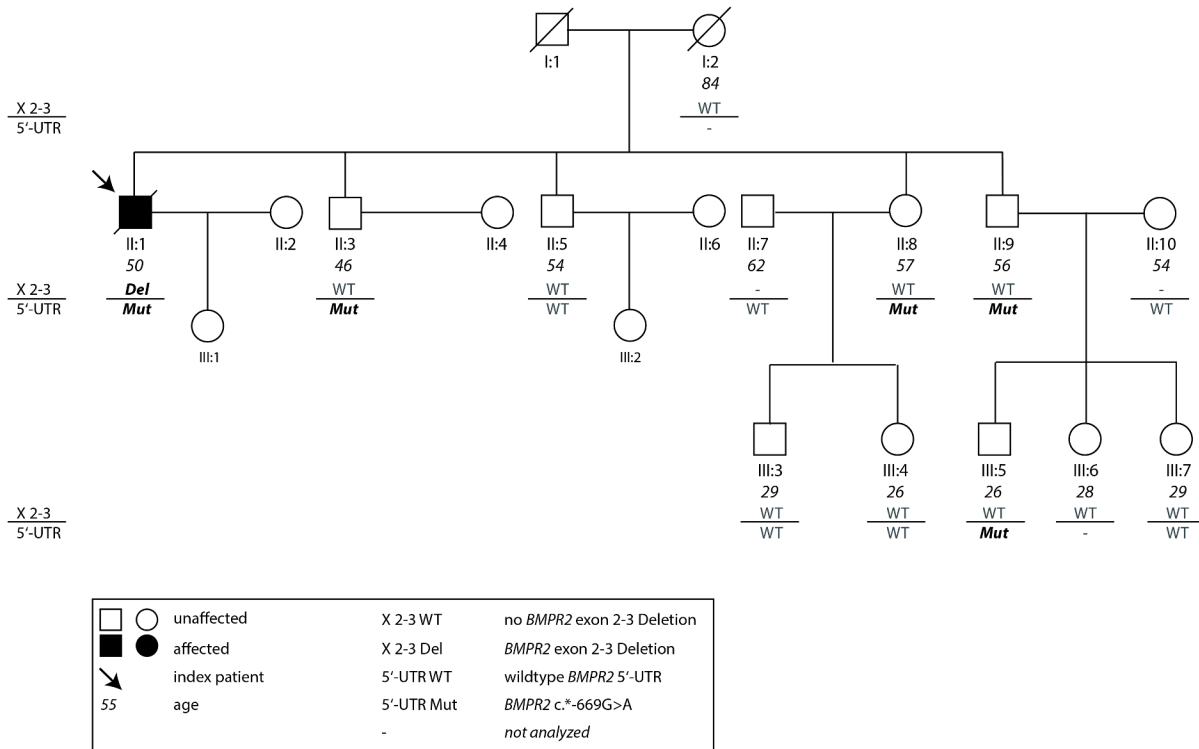

**Fig 1. Pedigree of Family 1.** The index patient of Family 1 (II:1, arrow) is carrier of the *BMPR2* promoter mutation c.-669G>A [21] and a deletion of exon 2 and 3 of the same gene. The c.-669G>A promoter variant is present in four additional family members (II:3, II:7, II:9, III:5) while the deletion of exon 2 and 3 is unique to the index patient with manifest PAH. Mut: mutation, UTR: untranslated region, WT: wild type, Del: Deletion, X 2–3: exon 2 to 3. The horizontal line separates the two loci in *BMPR2* promoter and *BMPR2* exon 2 to 3.

doi:10.1371/journal.pone.0133042.g001

## Results

### Clinical characteristics

In this study we included 2 index patients initially diagnosed as IPAH and their family members (Figs 1 and 2). The index patient of Family 1 (Fig 1) had symptoms of dyspnea since the age of 27 and was diagnosed at an age of 33 years. At diagnosis he was very severely affected with a mean pulmonary artery pressure (mPAP) of 70 mmHg and a pulmonary vascular resistance of 2000 dyn\*s\*cm<sup>-5</sup> (Table 1). The patient was treated with intravenous Iloprost and received a lung transplantation three years after diagnosis. The index patient of Family 2 (Fig 2) was a child of 13 years of age at diagnosis. At age 2 he had an operation of an atrial septal defect. At diagnosis, the mPAP measured with right heart catheterization was 46 mmHg. Pulmonary vascular resistance was 1055 dyn\*s\*cm<sup>-5</sup> at rest (Table 1). The patient died with 19 years of age due to PAH and right heart failure. Sixteen family members of both index patients (male = 10, female = 6) were clinically assessed [26–28] and revealed normal findings with normal PAPs and no further signs of pulmonary hypertension (Table 2).

### Genetic analysis

We analyzed the upstream region of the *BMPR2* gene in the two index PAH patients, who carried a mutation or unknown variant in the coding regions of the *BMPR2* and *ENG* gene, respectively (Figs 1 and 2; II:1 in Family 1 and III:1 in Family 2). Both index patients carried the mutation c.-669G>A in the *BMPR2* promoter. This mutation has already been described

by Wang and colleagues and functional analysis has been performed, showing reduced expression of *BMP2* [21].

## Family 1

Family 1 consists of 19 family members. Only the index patient of Family 1 suffered from manifest pulmonary arterial hypertension, which was very severe and diagnosed at young age (Fig 1). The index patient was carrier of the mutation c.-669G>A in the *BMP2* promoter, which has been previously associated with reduced *BMP2* expression [21]. Moreover, he had a deletion of exon 2 and 3 of the *BMP2* gene (c.77-?\_418+?del; Fig 1). This deletion leads to the loss of a large part of the extracellular ligand binding domain encoded by exons 1 to 3 [29]. Other deletions of exon 2 and/or 3 have been previously described in PAH patients [30, 31]. The deletion of exon 2 and 3 of the *BMP2* gene was not present in the index patient's mother. Due to insufficient amounts of DNA she could not be tested for the mutation in the promoter. Furthermore, we had no DNA of the father and could thus not test him for the two mutations. Nevertheless, we assume the deletion was transmitted from the father and the promoter mutation was transmitted from the mother, because she did not carry the deletion. However, we have to take into consideration the possibility of a *de novo* occurrence of one or both mutations.

The c.-669G>A promoter mutation was present in four additional healthy family members while the deletion of exon 2 and 3 was unique to the index patient with manifest PAH. None of the family members with the c.-669G>A mutation carried the *BMP2*-deletion and none were clinically affected.

## Family 2

Family 2 consists of 9 family members. Similarly as in Family 1, only the index patient was very severely affected by PAH. He harbored the same *BMP2* promoter mutation c.-669G>A as described for Family 1 (Fig 2). Additionally, the patient carried a variant in the *ENG* gene (c.1633G>A, p.(G545S)), which has been described earlier [32]. In the previous study the p.(G545S) variant was classified as a polymorphism because it was also present in the healthy mother (62 years) of the index patient and the index patient carried an additional frameshift mutation that was assumed to be disease causing [32]. Nevertheless, the authors suggested the possibility of a disease modifying effect for p.(G545S). Functional analyses for the latter variant have not been performed yet and prediction tools are inconclusive: PolyPhen-2 "probably damaging" [33], SIFTS "tolerated" [34], Align GVGD "C0" (less likely to interfere with function) [35] and MutationTaster "disease causing" [36]. Together with the findings in this study it is possible that the variant has a disease-modifying effect. In our family the index patient inherited one respective variant from each parent, both unaffected by PAH. The mother and a half-brother of the mother were also carriers of the c.-669G>A *BMP2* promoter mutation without clinical signs of PAH. This is in concert with the findings of Family 1, where we found that the described promoter variation does not lead to PAH when observed on its own.

## Discussion

In this study we describe for the first time that only those family members carrying a *BMP2* promoter mutation and an additional mutation/variant in a TGF- $\beta$  gene develop PAH, whereas their family members with only one mutation were not affected. Our findings are in line with the hypothesis that two mutations are contributing to the development and manifestation of PAH and have a penetrance-modifying effect. We hypothesize that the identified

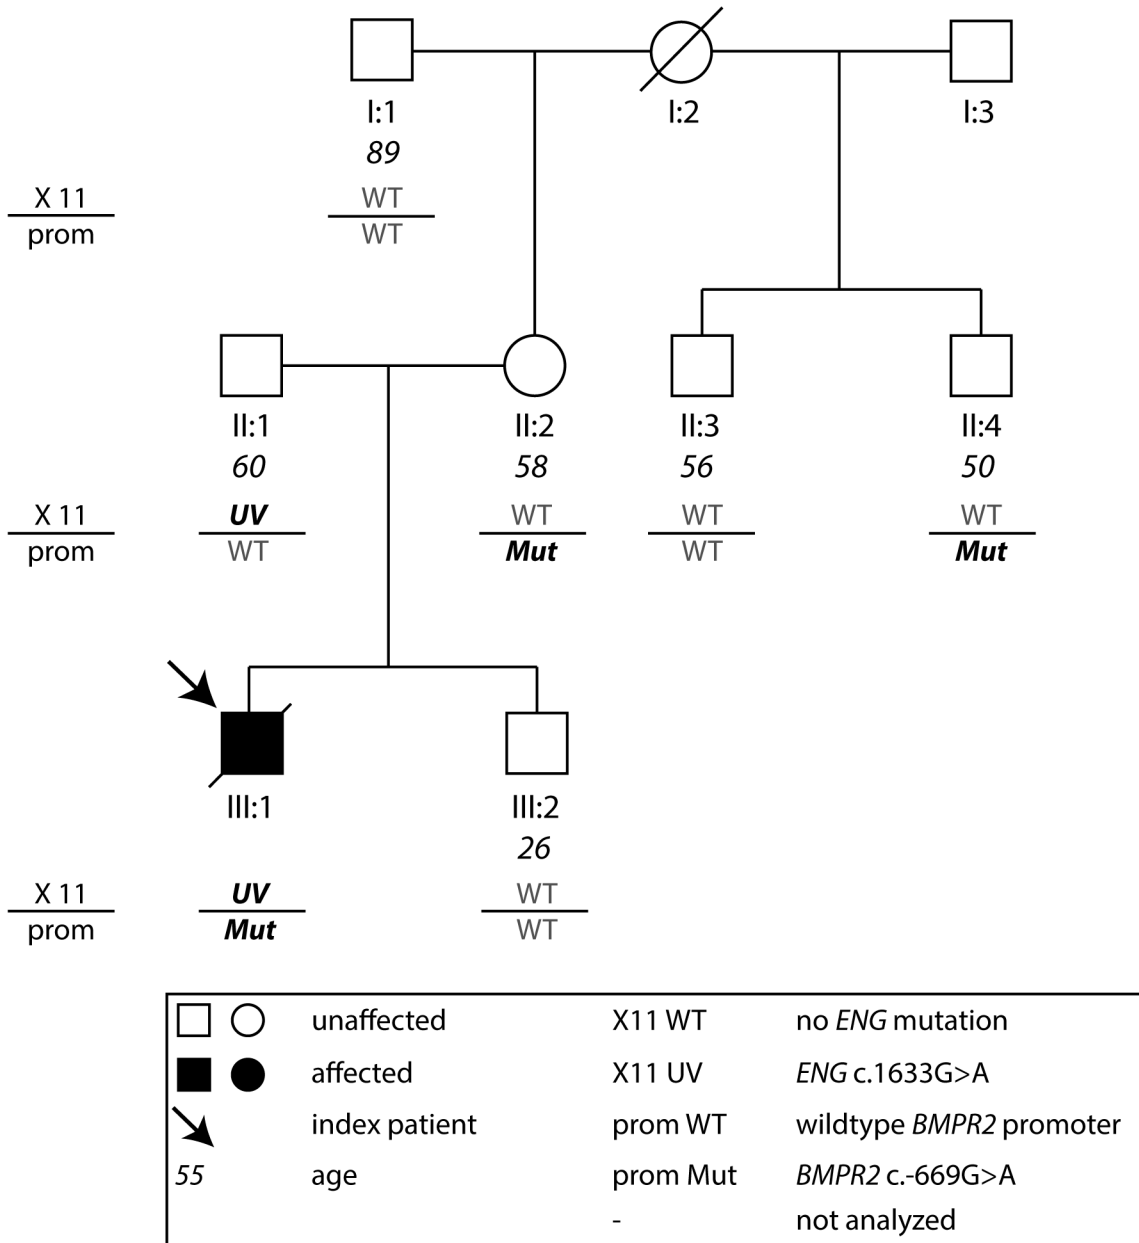

**Fig 2. Pedigree of Family 2.** The index patient of Family 2 (III:1, arrow) carries the *BMPR2* promoter mutation c.-669G>A [21] and a unclassified variant in the *ENG* gene (c.1633G>A, p.(G545S)). Mut: mutation, UV: unknown variant, UTR: untranslated region, WT: wild type, X 11: exon 11 *ENG*. The horizontal line separates the two loci in *BMPR2* promoter and *ENG* exon 11.

doi:10.1371/journal.pone.0133042.g002

germline mutation in the regulatory region of the *BMPR2* gene as a “second-hit” leads to a very severe clinical phenotype at young age in the affected family members.

### Mutations in the promoter region of *BMPR2* gene

Regulatory regions of TGF-β genes are not a major focus in PAH diagnostics so far, though they might harbor disease causing mutations. To our knowledge, only two previous studies describe HPAH families, in which a mutation in the *BMPR2* promoter was identified in an index patient [21, 37]. By measuring the relative abundance of mutant versus wild-type

**Table 1. Clinical characteristics of index patients at diagnosis.**

| Characteristic                                        | Index patient Family 1 | Index patient Family 2 |
|-------------------------------------------------------|------------------------|------------------------|
| Gender                                                | male                   | male                   |
| Age at diagnosis, years                               | 33                     | 13                     |
| Heart rate, min <sup>-1</sup>                         | 89                     | 96                     |
| Oxygen saturation, %                                  | 90                     | 98                     |
| Mean pulmonary artery pressure, mmHg                  | 70                     | 46                     |
| Pulmonary vascular resistance, dyn*s*cm <sup>-5</sup> | 2000                   | 1055                   |
| Cardiac index, l/min/m <sup>2</sup>                   | 1.9                    | 3.6                    |

doi:10.1371/journal.pone.0133042.t001

transcripts in leukocyte cDNA obtained from the patient, it was shown that the variant c.-944/5GC>AT leads to a significant decrease of the *BMP2* mRNA expression [37]. Furthermore, Wang and colleagues showed that the c.-669G>A promoter mutation caused a disruption of a SP3 transcription factor-binding site [21]. As a consequence, the mutated promoter sequence showed significantly decreased transcriptional activity in luciferase assays in comparison to the wild-type promoter sequence. These studies demonstrate that the upstream region of the *BMP2* gene is of yet underestimated importance in PAH diagnostics.

### Second-hit mutation may influence disease penetrance

The results of this study show that the interplay of different mutations or variants in the same pathway may be the critical difference between disease manifestation and healthy carriers. A

**Table 2. Clinical characteristics of family members.**

| Measurement                                                                                   | Mean* ± SD |
|-----------------------------------------------------------------------------------------------|------------|
| Age, years                                                                                    | 35 ± 19    |
| Height, cm                                                                                    | 167 ± 12   |
| Weight, kg                                                                                    | 64 ± 15    |
| Heart rate, min <sup>-1</sup>                                                                 | 72 ± 16    |
| Systemic blood pressure systolic, mmHg                                                        | 119 ± 19   |
| Systemic blood pressure diastolic, mmHg                                                       | 76 ± 7     |
| Systemic blood pressure systolic max, mmHg                                                    | 184 ± 33   |
| Systemic blood pressure diastolic max, mmHg                                                   | 82 ± 13    |
| Oxygen saturation max exercise, %                                                             | 94 ± 2     |
| Systolic pulmonary artery pressure rest, mmHg                                                 | 23 ± 6     |
| Systolic pulmonary artery pressure max, mmHg                                                  | 48 ± 13    |
| Workload max, Watts                                                                           | 153 ± 55   |
| Heart rate max, min <sup>-1</sup>                                                             | 160 ± 15   |
| Peak oxygen consumption (VO <sub>2</sub> )/kg, ml/min/kg                                      | 29 ± 6     |
| Peak oxygen consumption, ml/min                                                               | 1927 ± 561 |
| Ventilatory equivalent for carbon dioxide (EqCO <sub>2</sub> ) at anaerobic threshold, ml/min | 24 ± 4     |
| Oxygen consumption (VO <sub>2</sub> ) at anaerobic threshold, ml/min                          | 1515 ± 503 |
| Oxygen pulse, (ml/min)*min <sup>-1</sup>                                                      | 12 ± 3     |

\*Mean is based on 16 individuals; while maximal blood pressure, peak VO<sub>2</sub>, EqCO<sub>2</sub>, VO<sub>2</sub> at anaerobic threshold and oxygen pulse are based on 10 individuals

EqCO<sub>2</sub>: ventilatory equivalent for carbon dioxide, max: value at maximal workload, VO<sub>2</sub>/kg: oxygen consumption/kg.

doi:10.1371/journal.pone.0133042.t002



similar pattern was also observed in two studies of American PAH families, where age of onset and penetrance was influenced by a second mutation, additional to *BMP2*, in the *TGFB1* gene in the first family and in the TGF- $\beta$  regulating gene *THBS1* in the second family [38, 39]. This hypothesis has also been suggested by the study of Wang et al. [9]. Similarly, variations in the regulatory region of the gene, as observed in the promoter in this study, may impact disease penetrance. It is interesting to note that all healthy family members carrying a variant or mutation in *BMP2* or *ENG* were heterozygotes. Thus, sufficient protein might be produced in carriers of one mutation or variant by the intact allele obtained from the other parent preventing disease manifestation. In contrast, in affected patients the modifier gene may lead to a strong signaling reduction and disease manifestation. Phillips et al. [38] showed that *TGFB1* single nucleotide polymorphisms (SNPs) modulate the age at diagnosis and penetrance of HPAH in *BMP2* mutation heterozygotes. This modulation is an example of synergistic heterozygosity and likely functions by affecting TGF- $\beta$  /BMP signaling imbalance.

### Modifier genes in other hereditary diseases

In other hereditary diseases further modifying genes have been identified as well. For example, the long QT syndrome (LQTS) has been considered classically an autosomal dominant genetic disorder, with heterozygous mutations in the three major LQTS-susceptibility genes (*KCNQ1/LQT1*, 30%–35%; *KCNH2/LQT2*, 25%–30%, and *SCN5A/LQT3*, 5%–10%) marked incomplete penetrance and variable expressivity [40–42]. It has been described that penetrance and expressivity in *KCNQ1* mutation-positive subjects was modified by the common *KCNE1-D85N* polymorphism [43–45]. Thus, it appears that common amino acid-altering genetic variation may also serve as genetic modifiers of LQTS disease severity regardless of whether the second hit occurs within or outside the gene harboring the primary disease causing mutation.

Other well-studied examples are the hair disease monilethrix (*KRT86*) [46] and different types of retinis pigmentosa (*PRPF8* and *PRPF31*) [47, 48].

### Change in genetic screening methods might be useful

Today, standard genetic screening methods focus on sequencing of coding regions of the *BMP2*, *ALK1*, *Endoglin*, *SMAD9*, *CAV1*, *KCNK3* and *EIF2AK4* genes [49]. Although HPAH is widely accepted as a monogenetic disease with autosomal dominant inheritance, only 20–80% of *BMP2* mutation carriers will develop the disease due to an incomplete age and gender related penetrance [18, 19]. It is however common to stop mutation screening as soon as one mutation has been identified in the index patient. Thus, additional mutations might be missed and those second mutations with a major impact on the manifestation of PAH could be overlooked. Therefore, we suggest thorough screening of further genes in patients, in whom one disease-causing mutation has already been identified to obtain a full picture of genetic factors influencing disease manifestation. This will be facilitated with the advent of highly parallel next generation sequencing technologies. In this manner, the further causes for the reduced penetrance could be revealed and earlier identification of high risk family members may be achieved.

### Conclusion

The results of the present study, led us to the hypothesis that family members with two mutations have a higher risk to develop manifest PAH than family members carrying only one mutation or variant. To complement our knowledge of the genetic factors influencing disease manifestation, we propose thorough screening of index patients with mutation-carrying albeit healthy family members.



## Acknowledgments

We would like to thank all patients who participated in the study.

## Author Contributions

Conceived and designed the experiments: RRV CAE NE CF EG KH. Performed the experiments: RRV CAE NE CF ML EG KH. Analyzed the data: RRV CAE NE CF ML EG KH. Contributed reagents/materials/analysis tools: RRV CAE NE CF EG KH. Wrote the paper: RRV CAE NE CF ML EG KH.

## References

1. Trembath RC. Mutations in the TGF-beta type 1 receptor, ALK1, in combined primary pulmonary hypertension and hereditary haemorrhagic telangiectasia, implies pathway specificity. *The Journal of heart and lung transplantation: the official publication of the International Society for Heart Transplantation*. 2001; 20(2):175. PMID: [11250282](#).
2. Chaouat A, Coulet F, Favre C, Simonneau G, Weitzenblum E, Soubrier F, et al. Endoglin germline mutation in a patient with hereditary haemorrhagic telangiectasia and dexfenfluramine associated pulmonary arterial hypertension. *Thorax*. 2004; 59(5):446–8. PMID: [15115879](#); PubMed Central PMCID: PMC1746994.
3. Shintani M, Yagi H, Nakayama T, Saji T, Matsuoka R. A new nonsense mutation of SMAD8 associated with pulmonary arterial hypertension. *Journal of medical genetics*. 2009; 46(5):331–7. doi: [10.1136/jmg.2008.062703](#) PMID: [19211612](#).
4. Soubrier F, Chung WK, Machado R, Grünig E, Aldred M, Geraci M, et al. Genetics and genomics of pulmonary arterial hypertension. *Journal of the American College of Cardiology*. 2013; 62(25 Suppl):D13–21. doi: [10.1016/j.jacc.2013.10.035](#) PMID: [24355637](#).
5. Machado RD, Eickelberg O, Elliott CG, Geraci MW, Hanaoka M, Loyd JE, et al. Genetics and genomics of pulmonary arterial hypertension. *Journal of the American College of Cardiology*. 2009; 54(1 Suppl): S32–42. doi: [10.1016/j.jacc.2009.04.015](#) PMID: [19555857](#); PubMed Central PMCID: PMC3725550.
6. Pfarr N, Szamalek-Hoegel J, Fischer C, Hinderhofer K, Nagel C, Ehlken N, et al. Hemodynamic and clinical onset in patients with hereditary pulmonary arterial hypertension and *BMPR2* mutations. *Respir Res*. 2011; 12:99. doi: [10.1186/1465-9921-12-99](#) PMID: [21801371](#); PubMed Central PMCID: PMC3163544.
7. Hinderhofer K, Fischer C, Pfarr N, Szamalek-Hoegel J, Lichtblau M, Nagel C, et al. Identification of a new intronic *BMPR2*-mutation and early diagnosis of heritable pulmonary arterial hypertension in a large family with mean clinical follow-up of 12 years. *PLOS one*. 2013; under minor revision.
8. Pousada G, Baloiira A, Vilarino C, Cifrian JM, Valverde D. Novel mutations in *BMPR2*, *ACVRL1* and *KCNA5* genes and hemodynamic parameters in patients with pulmonary arterial hypertension. *PLoS One*. 2014; 9(6):e100261. doi: [10.1371/journal.pone.0100261](#) PMID: [24936649](#); PubMed Central PMCID: PMC4061078.
9. Wang G, Knight L, Ji R, Lawrence P, Kanaan U, Li L, et al. Early onset severe pulmonary arterial hypertension with 'two-hit' digenic mutations in both *BMPR2* and *KCNA5* genes. *Int J Cardiol*. 2014. doi: [10.1016/j.ijcard.2014.08.124](#) PMID: [25189502](#).
10. Remillard CV, Tigno DD, Platoshyn O, Burg ED, Brevnova EE, Conger D, et al. Function of Kv1.5 channels and genetic variations of *KCNA5* in patients with idiopathic pulmonary arterial hypertension. *Am J Physiol Cell Physiol*. 2007; 292(5):C1837–53. doi: [10.1152/ajpcell.00405.2006](#) PMID: [17267549](#).
11. Ma L, Roman-Campos D, Austin ED, Eyries M, Sampson KS, Soubrier F, et al. A novel channelopathy in pulmonary arterial hypertension. *N Engl J Med*. 2013; 369(4):351–61. doi: [10.1056/NEJMoa1211097](#) PMID: [23883380](#); PubMed Central PMCID: PMC3792227.
12. Austin ED, Ma L, LeDuc C, Berman Rosenzweig E, Borczuk A, Phillips JA 3rd, et al. Whole exome sequencing to identify a novel gene (caveolin-1) associated with human pulmonary arterial hypertension. *Circ Cardiovasc Genet*. 2012; 5(3):336–43. doi: [10.1161/CIRCGENETICS.111.961888](#) PMID: [22474227](#); PubMed Central PMCID: PMC3380156.
13. Dunmore BJ, Drake KM, Upton PD, Toshner MR, Aldred MA, Morrell NW. The lysosomal inhibitor, chloroquine, increases cell surface *BMPR-II* levels and restores *BMP9* signalling in endothelial cells harbouring *BMPR-II* mutations. *Hum Mol Genet*. 2013; 22(18):3667–79. doi: [10.1093/hmg/ddt216](#) PMID: [23669347](#); PubMed Central PMCID: PMC3749859.
14. Upton PD, Davies RJ, Trembath RC, Morrell NW. Bone morphogenetic protein (BMP) and activin type II receptors balance *BMP9* signals mediated by activin receptor-like kinase-1 in human pulmonary

- artery endothelial cells. *J Biol Chem.* 2009; 284(23):15794–804. doi: [10.1074/jbc.M109.002881](https://doi.org/10.1074/jbc.M109.002881) PMID: [19366699](https://pubmed.ncbi.nlm.nih.gov/19366699/); PubMed Central PMCID: PMC2708876.
15. Wooderchak-Donahue WL, McDonald J, O'Fallon B, Upton PD, Li W, Roman BL, et al. BMP9 mutations cause a vascular-anomaly syndrome with phenotypic overlap with hereditary hemorrhagic telangiectasia. *Am J Hum Genet.* 2013; 93(3):530–7. doi: [10.1016/j.ajhg.2013.07.004](https://doi.org/10.1016/j.ajhg.2013.07.004) PMID: [23972370](https://pubmed.ncbi.nlm.nih.gov/23972370/); PubMed Central PMCID: PMC3769931.
  16. Eyries M, Montani D, Girerd B, Perret C, Leroy A, Lonjou C, et al. EIF2AK4 mutations cause pulmonary veno-occlusive disease, a recessive form of pulmonary hypertension. *Nat Genet.* 2014; 46(1):65–9. doi: [10.1038/ng.2844.24292273](https://doi.org/10.1038/ng.2844.24292273) PMID: [24292273](https://pubmed.ncbi.nlm.nih.gov/24292273/)
  17. Laveneziana P, Montani D, Dorfmueller P, Girerd B, Sitbon O, Jais X, et al. Mechanisms of exertional dyspnoea in pulmonary veno-occlusive disease with EIF2AK4 mutations. *Eur Respir J.* 2014. doi: [10.1183/09031936.00088914](https://doi.org/10.1183/09031936.00088914) PMID: [25142489](https://pubmed.ncbi.nlm.nih.gov/25142489/).
  18. Loyd JE, Butler MG, Foroud TM, Conneally PM, Phillips JA 3rd, Newman JH. Genetic anticipation and abnormal gender ratio at birth in familial primary pulmonary hypertension. *Am J Respir Crit Care Med.* 1995; 152(1):93–7. doi: [10.1164/ajrccm.152.1.7599869](https://doi.org/10.1164/ajrccm.152.1.7599869) PMID: [7599869](https://pubmed.ncbi.nlm.nih.gov/7599869/).
  19. Loyd JE, Primm RK, Newman JH. Familial primary pulmonary hypertension: clinical patterns. *Am Rev Respir Dis.* 1984; 129(1):194–7. PMID: [6703480](https://pubmed.ncbi.nlm.nih.gov/6703480/).
  20. Rabinovitch M. Molecular pathogenesis of pulmonary arterial hypertension. *J Clin Invest.* 2012; 122(12):4306–13. doi: [10.1172/JCI60658](https://doi.org/10.1172/JCI60658) PMID: [23202738](https://pubmed.ncbi.nlm.nih.gov/23202738/); PubMed Central PMCID: PMC353531.
  21. Wang H, Li W, Zhang W, Sun K, Song X, Gao S, et al. Novel promoter and exon mutations of the *BMPR2* gene in Chinese patients with pulmonary arterial hypertension. *Eur J Hum Genet.* 2009; 17(8):1063–9. doi: [10.1038/ejhg.2009.3](https://doi.org/10.1038/ejhg.2009.3) PMID: [19223935](https://pubmed.ncbi.nlm.nih.gov/19223935/); PubMed Central PMCID: PMC2986562.
  22. Hamid R, Cogan JD, Hedges LK, Austin E, Phillips JA 3rd, Newman JH, et al. Penetrance of pulmonary arterial hypertension is modulated by the expression of normal *BMPR2* allele. *Hum Mutat.* 2009; 30(4):649–54. doi: [10.1002/humu.20922](https://doi.org/10.1002/humu.20922) PMID: [19206171](https://pubmed.ncbi.nlm.nih.gov/19206171/); PubMed Central PMCID: PMC2663001.
  23. Simonneau G, Gatzoulis MA, Adatia I, Celermajer D, Denton C, Ghofrani A, et al. Updated clinical classification of pulmonary hypertension. *Journal of the American College of Cardiology.* 2013; 62(25 Suppl):D34–41. doi: [10.1016/j.jacc.2013.10.029](https://doi.org/10.1016/j.jacc.2013.10.029) PMID: [24355639](https://pubmed.ncbi.nlm.nih.gov/24355639/).
  24. Grünig E, Weissmann S, Ehlken N, Fijalkowska A, Fischer C, Fourme T, et al. Stress Doppler echocardiography in relatives of patients with idiopathic and familial pulmonary arterial hypertension: results of a multicenter European analysis of pulmonary artery pressure response to exercise and hypoxia. *Circulation.* 2009; 119(13):1747–57. doi: [10.1161/CIRCULATIONAHA.108.800938](https://doi.org/10.1161/CIRCULATIONAHA.108.800938) PMID: [19307479](https://pubmed.ncbi.nlm.nih.gov/19307479/).
  25. Hinderhofer K, Fischer C, Pfarr N, Szamalek-Hoegel J, Lichtblau M, Nagel C, et al. Identification of a new intronic *BMPR2*-mutation and early diagnosis of heritable pulmonary arterial hypertension in a large family with mean clinical follow-up of 12 years. *PLoS One.* 2014; 9(3):e91374. doi: [10.1371/journal.pone.0091374](https://doi.org/10.1371/journal.pone.0091374) PMID: [24621962](https://pubmed.ncbi.nlm.nih.gov/24621962/); PubMed Central PMCID: PMC3951367.
  26. Grünig E, Ehlken N, Ghofrani A, Staehler G, Meyer FJ, Juenger J, et al. Effect of exercise and respiratory training on clinical progression and survival in patients with severe chronic pulmonary hypertension. *Respiration.* 2011; 81(5):394–401. doi: [10.1159/000322475](https://doi.org/10.1159/000322475) PMID: [21311162](https://pubmed.ncbi.nlm.nih.gov/21311162/).
  27. Grünig E, Lichtblau M, Ehlken N, Ghofrani HA, Reichenberger F, Staehler G, et al. Safety and efficacy of exercise training in various forms of pulmonary hypertension. *Eur Respir J.* 2012; 40(1):84–92. doi: [10.1183/09031936.00123711](https://doi.org/10.1183/09031936.00123711) PMID: [22323570](https://pubmed.ncbi.nlm.nih.gov/22323570/).
  28. Grünig E, Maier F, Ehlken N, Fischer C, Lichtblau M, Blank N, et al. Exercise training in pulmonary arterial hypertension associated with connective tissue diseases. *Arthritis research & therapy.* 2012; 14(3):R148. doi: [10.1186/ar3883](https://doi.org/10.1186/ar3883) PMID: [22709477](https://pubmed.ncbi.nlm.nih.gov/22709477/); PubMed Central PMCID: PMC3446533.
  29. Machado RD, Pauciulo MW, Thomson JR, Lane KB, Morgan NV, Wheeler L, et al. *BMPR2* haploinsufficiency as the inherited molecular mechanism for primary pulmonary hypertension. *Am J Hum Genet.* 2001; 68(1):92–102. PMID: [11115378](https://pubmed.ncbi.nlm.nih.gov/11115378/); PubMed Central PMCID: PMC1234937.
  30. Rosenzweig EB, Morse JH, Knowles JA, Chada KK, Khan AM, Roberts KE, et al. Clinical implications of determining *BMPR2* mutation status in a large cohort of children and adults with pulmonary arterial hypertension. *J Heart Lung Transplant.* 2008; 27(6):668–74. doi: [10.1016/j.healun.2008.02.009](https://doi.org/10.1016/j.healun.2008.02.009) PMID: [18503968](https://pubmed.ncbi.nlm.nih.gov/18503968/).
  31. Cogan JD, Pauciulo MW, Batchman AP, Prince MA, Robbins IM, Hedges LK, et al. High frequency of *BMPR2* exonic deletions/duplications in familial pulmonary arterial hypertension. *Am J Respir Crit Care Med.* 2006; 174(5):590–8. doi: [10.1164/rccm.200602-165OC](https://doi.org/10.1164/rccm.200602-165OC) PMID: [16728714](https://pubmed.ncbi.nlm.nih.gov/16728714/); PubMed Central PMCID: PMC2648061.
  32. Brakensiek K, Frye-Boukhriess H, Malzer M, Abramowicz M, Bahr MJ, von Beckerath N, et al. Detection of a significant association between mutations in the *ACVRL1* gene and hepatic involvement in German patients with hereditary haemorrhagic telangiectasia. *Clinical genetics.* 2008; 74(2):171–7. doi: [10.1111/j.1399-0004.2008.01029.x](https://doi.org/10.1111/j.1399-0004.2008.01029.x) PMID: [18498373](https://pubmed.ncbi.nlm.nih.gov/18498373/).

33. Adzhubei IA, Schmidt S, Peshkin L, Ramensky VE, Gerasimova A, Bork P, et al. A method and server for predicting damaging missense mutations. *Nat Methods*. 2010; 7(4):248–9. doi: [10.1038/nmeth0410-248](https://doi.org/10.1038/nmeth0410-248) PMID: [20354512](https://pubmed.ncbi.nlm.nih.gov/20354512/); PubMed Central PMCID: PMC2855889.
34. Velankar S, Dana JM, Jacobsen J, van Ginkel G, Gane PJ, Luo J, et al. SIFTS: Structure Integration with Function, Taxonomy and Sequences resource. *Nucleic Acids Res*. 2013; 41(Database issue): D483–9. doi: [10.1093/nar/gks1258](https://doi.org/10.1093/nar/gks1258) PMID: [23203869](https://pubmed.ncbi.nlm.nih.gov/23203869/); PubMed Central PMCID: PMC3531078.
35. Mathe E, Olivier M, Kato S, Ishioka C, Hainaut P, Tavtigian SV. Computational approaches for predicting the biological effect of p53 missense mutations: a comparison of three sequence analysis based methods. *Nucleic Acids Res*. 2006; 34(5):1317–25. doi: [10.1093/nar/gkj518](https://doi.org/10.1093/nar/gkj518) PMID: [16522644](https://pubmed.ncbi.nlm.nih.gov/16522644/); PubMed Central PMCID: PMC1390679.
36. Schwarz JM, Rodelsperger C, Schuelke M, Seelow D. MutationTaster evaluates disease-causing potential of sequence alterations. *Nat Methods*. 2010; 7(8):575–6. doi: [10.1038/nmeth0810-575](https://doi.org/10.1038/nmeth0810-575) PMID: [20676075](https://pubmed.ncbi.nlm.nih.gov/20676075/).
37. Aldred MA, Machado RD, James V, Morrell NW, Trembath RC. Characterization of the *BMPR2* 5'-untranslated region and a novel mutation in pulmonary hypertension. *Am J Respir Crit Care Med*. 2007; 176(8):819–24. doi: [10.1164/rccm.200701-164OC](https://doi.org/10.1164/rccm.200701-164OC) PMID: [17641158](https://pubmed.ncbi.nlm.nih.gov/17641158/).
38. Phillips JA 3rd, Poling JS, Phillips CA, Stanton KC, Austin ED, Cogan JD, et al. Synergistic heterozygosity for TGFbeta1 SNPs and *BMPR2* mutations modulates the age at diagnosis and penetrance of familial pulmonary arterial hypertension. *Genetics in medicine: official journal of the American College of Medical Genetics*. 2008; 10(5):359–65. doi: [10.1097/GIM.0b013e318172dcdcf](https://doi.org/10.1097/GIM.0b013e318172dcdcf) PMID: [18496036](https://pubmed.ncbi.nlm.nih.gov/18496036/).
39. Maloney JP, Stearman RS, Bull TM, Calabrese DW, Tripp-Addison ML, Wick MJ, et al. Loss-of-function thrombospondin-1 mutations in familial pulmonary hypertension. *Am J Physiol Lung Cell Mol Physiol*. 2012; 302(6):L541–54. doi: [10.1152/ajplung.00282.2011](https://doi.org/10.1152/ajplung.00282.2011) PMID: [22198906](https://pubmed.ncbi.nlm.nih.gov/22198906/); PubMed Central PMCID: PMC3311532.
40. Giudicessi JR, Ackerman MJ. Determinants of incomplete penetrance and variable expressivity in heritable cardiac arrhythmia syndromes. *Transl Res*. 2013; 161(1):1–14. doi: [10.1016/j.trsl.2012.08.005](https://doi.org/10.1016/j.trsl.2012.08.005) PMID: [22995932](https://pubmed.ncbi.nlm.nih.gov/22995932/); PubMed Central PMCID: PMC3624763.
41. Tester DJ, Will ML, Haglund CM, Ackerman MJ. Compendium of cardiac channel mutations in 541 consecutive unrelated patients referred for long QT syndrome genetic testing. *Heart Rhythm*. 2005; 2(5):507–17. doi: [10.1016/j.hrthm.2005.01.020](https://doi.org/10.1016/j.hrthm.2005.01.020) PMID: [15840476](https://pubmed.ncbi.nlm.nih.gov/15840476/).
42. Kapplinger JD, Tester DJ, Salisbury BA, Carr JL, Harris-Kerr C, Pollevick GD, et al. Spectrum and prevalence of mutations from the first 2,500 consecutive unrelated patients referred for the FAMILION long QT syndrome genetic test. *Heart Rhythm*. 2009; 6(9):1297–303. doi: [10.1016/j.hrthm.2009.05.021](https://doi.org/10.1016/j.hrthm.2009.05.021) PMID: [19716085](https://pubmed.ncbi.nlm.nih.gov/19716085/); PubMed Central PMCID: PMC3049907.
43. Hasegawa K, Ohno S, Itoh H, Makiyama T, Aiba T, Nakano Y, et al. A rare *KCNE1* polymorphism, D85N, as a genetic modifier of long QT syndrome. *Journal of Arrhythmia*. 2014; 30(3):161–6. Epub 26.10.2013. doi: [10.1016/j.joa.2013.08.004](https://doi.org/10.1016/j.joa.2013.08.004)
44. Lahtinen AM, Marjamaa A, Swan H, Kontula K. *KCNE1* D85N polymorphism—a sex-specific modifier in type 1 long QT syndrome? *BMC Med Genet*. 2011; 12:11. doi: [10.1186/1471-2350-12-11](https://doi.org/10.1186/1471-2350-12-11) PMID: [21244686](https://pubmed.ncbi.nlm.nih.gov/21244686/); PubMed Central PMCID: PMC3032654.
45. Westenskow P, Splawski I, Timothy KW, Keating MT, Sanguinetti MC. Compound mutations: a common cause of severe long-QT syndrome. *Circulation*. 2004; 109(15):1834–41. doi: [10.1161/01.CIR.0000125524.34234.13](https://doi.org/10.1161/01.CIR.0000125524.34234.13) PMID: [15051636](https://pubmed.ncbi.nlm.nih.gov/15051636/).
46. De Cruz R, Horev L, Green J, Babay S, Sladden M, Zlotogorski A, et al. A novel monilethrix mutation in coil 2A of *KRT86* causing autosomal dominant monilethrix with incomplete penetrance. *The British journal of dermatology*. 2012; 166 Suppl 2:20–6. doi: [10.1111/j.1365-2133.2012.10861.x](https://doi.org/10.1111/j.1365-2133.2012.10861.x) PMID: [22670615](https://pubmed.ncbi.nlm.nih.gov/22670615/).
47. Maubaret CG, Vaclavik V, Mukhopadhyay R, Waseem NH, Churchill A, Holder GE, et al. Autosomal dominant retinitis pigmentosa with intrafamilial variability and incomplete penetrance in two families carrying mutations in *PRPF8*. *Investigative ophthalmology & visual science*. 2011; 52(13):9304–9. doi: [10.1167/iovs.11-8372](https://doi.org/10.1167/iovs.11-8372) PMID: [22039234](https://pubmed.ncbi.nlm.nih.gov/22039234/).
48. Saini S, Robinson PN, Singh JR, Vanita V. A novel 7 bp deletion in *PRPF31* associated with autosomal dominant retinitis pigmentosa with incomplete penetrance in an Indian family. *Experimental eye research*. 2012; 104:82–8. doi: [10.1016/j.exer.2012.09.010](https://doi.org/10.1016/j.exer.2012.09.010) PMID: [23041261](https://pubmed.ncbi.nlm.nih.gov/23041261/).
49. Austin ED, Loyd JE. Heritable forms of pulmonary arterial hypertension. *Seminars in respiratory and critical care medicine*. 2013; 34(5):568–80. doi: [10.1055/s-0033-1355443](https://doi.org/10.1055/s-0033-1355443) PMID: [24037626](https://pubmed.ncbi.nlm.nih.gov/24037626/).
